# Supplementary material for: Spontaneous human CD8 T cell and autoimmune encephalomyelitis-induced CD4/CD8 T cell lesions in the brain and spinal cord of HLA-DRB1*15-positive multiple sclerosis humanized immune system mice
Source: eLife. 2024 Jun 20;12:RP88826. doi: 10.7554/eLife.88826 (PMC11189630; doi:10.7554/eLife.88826)
Supplement: Figure 1—figure supplement 1—source data 1. [file elife-88826-fig1-figsupp1-data1.xlsx]

## Sheet: Sheet1
Figure 1- figure supplement 1C- source data 1: Analyses of peripheral blood samples from MS and healthy PBMC donors: Clinical interpretation of EBV antibody results
HLA genotype Diagnosis (donor type)	VCA IgG Status	VCA IgG Absorbance	VCA IgG OD Cutoff	VCA IgM Status	VCA IgM Absorbance	VCA IgM OD Cutoff	VCA IgA Status	VCA IgA Absorbance	VCA IgA OD Cutoff	EA IgG Status	EA IgG Absorbance	EA IgG OD Cutoff	EBNA1 IgG Status	EBNA1 IgG Absorbance	EBNA1 IgG OD Cutoff	EBNA1 IgM Status	EBNA1 IgM Absorbance	EBNA1 IgM OD Cutoff	clinical.interpretation		clinical.code	clinical.interpretation
DR15 MS1	1	0.861	0.08802	0	0.0834	0.29144	0	0.0667	0.193666	0	0.22	0.289695	1	1.133	0.284425	1	0.311	0.2744	4		0	Seronegative
DR13 MS	1	0.874	0.08802	0	0.0261	0.29144	1	0.2893	0.193666	1	0.762	0.289695	1	1.1	0.284425	0	0.07	0.2744	2		1	Primoinfection
DR15 HI	1	0.899	0.08802	0	0.1162	0.29144	1	0.683	0.193666	1	0.622	0.289695	1	0.9225	0.284425	1	0.367	0.2744	4		2	Suspect reactivation
DR15 MS2	1	1.4036	0.30768	0	0.0236	0.29144	0	0.04	0.193666	0	0.5647	0.535153	1	2.2502	0.514924	0	0.30885	0.650224	3		3	Seropositive without symptoms of active infection
DR15 MS3	1	3.2896	0.30768	0	0.0573	0.29144	1	0.8273	0.193666	1	0.8659	0.535153	1	2.4736	0.514924	0	0.4777	0.650224	2		4	Anomalous reactivation
DR15 MS4	1	3.0485	0.30768	0	0.0662	0.29144	0	0.1202	0.193666	1	0.8331	0.535153	1	2.39545	0.514924	1	0.7388	0.650224	4		5	Low VCA IgG avidity
DR15 MS5	1	2.9011	0.30768	1	0.3932	0.29144	1	2.5099	0.193666	0	0.4418	0.535153	1	2.1481	0.514924	0	0.50315	0.650224	2
